# Supplementary material for: RiboRid: A low cost, advanced, and ultra-efficient method to remove ribosomal RNA for bacterial transcriptomics
Source: PLoS Genet. 2021 Sep 27;17(9):e1009821. doi: 10.1371/journal.pgen.1009821 (PMC8496792; doi:10.1371/journal.pgen.1009821)
Supplement: S7 Table — (XLSX) [file pgen.1009821.s019.xlsx]

## Sheet: Fig 2D
Data for Fig 2D. E: E-value of BLAST alignment, CM: consecutive matches
Total		E<10		E<1		E<1 and 15CM
Gene	Log2FC	Gene	Log2FC	Gene	Log2FC	Gene	Log2FC
thrL	-3.75	talB	-0.455	talB	-0.455	talB	-0.495
thrA	-0.823	mog	-0.641	caiF	-1.435	rhsH	0.215
thrB	-0.37	yaaI	-1.479	caiA	-0.255	focA	-0.903
thrC	-0.358	carB	-1.053	betB	-0.833	rluC	-0.322
yaaX	-1.24	caiF	-1.435	glsA	0.195	ndh	-1.182
yaaA	-0.282	caiD	-0.112	rhsH	-0.066	ydhW	-0.923
yaaJ	0.29	caiB	-0.13	glxK	0.086	nuoC	-0.535
talB	-0.455	caiA	-0.255	fepA	-0.382	yfbS	-0.656
mog	-0.641	caiT	-0.291	entB	-0.467	truA	-0.785
satP	-2.002	yaaU	-0.517	bioC	0.808	rlmD	-0.59
yaaW	0.635	rapA	-0.806	ybiV	-0.357	lysA	0.244
yaaI	-1.479	thiP	0.125	focA	-0.752	pabA	-0.328
dnaK	-0.376	sgrR	-0.246	pgaB	0.25	malP	-0.412
dnaJ	-0.594	leuA	-1.587	rluC	-0.099	glgA	-0.66
insL1	-0.186	ilvI	-0.216	ndh	-0.845	xylB	0.528
mokC	-0.229	rsmH	-0.665	ydaN	-0.705	lyxK	-1.893
hokC	2.321	murD	-0.239	paaZ	-0.237	dnaN	-0.828
sokC	0	ddlB	-0.273	opgD	-0.073	fecB	-1.191
nhaA	0.016	ftsA	-0.297	ydcR	0.114
nhaR	-0.227	ppdD	-0.838	quuQ	-0.91
insB1	-0.873	nadC	-0.712	ydhW	-2.452
insA	-0.907	yadE	-0.19	prc	-0.408
rpsT	-0.789	htrE	-0.148	ptrB	-0.207
yaaY	1.797	hrpB	-0.449	mepM	-0.348
ribF	-0.875	mrcB	-0.797	yeeL	0.09
ileS	-0.847	fhuA	-0.618	wzb	0
lspA	-1.718	cdaR	-0.546	nuoJ	-0.549
fkpB	-1.151	glnD	-0.496	nuoC	-0.497
ispH	-0.713	bamA	-0.215	yfbS	-0.577
rihC	-0.895	skp	-0.163	truA	-1.02
dapB	-0.663	tilS	-0.885	rlmD	-0.473
carA	-0.732	proS	-0.702	csdA	-0.684
carB	-1.053	ivy	0.287	lysA	0.125
caiF	-1.435	lfhA	-0.444	araE	-0.323
caiE	-0.169	proA	-0.931	ygeK	-0.397
caiD	-0.112	insN	0.494	ygfS	-2.233
caiC	0.505	yagA	0	fadH	-1.077
caiB	-0.13	argF	-0.008	pabA	-0.785
caiA	-0.255	paoA	-1.858	malP	-0.216
caiT	-0.291	ecpD	-0.293	malT	-0.811
fixA	-0.956	ecpC	-0.294	glgA	-0.659
fixB	-0.101	eaeH	0	xylB	-0.353
fixC	-0.083	ykgG	0.499	lyxK	-1.429
fixX	-1.175	betA	-0.765	dnaN	-0.879
yaaU	-0.517	betB	-0.833	yifK	-0.783
kefF	0.489	betI	-0.722	fecB	-1.136
kefC	0.268	yahE	0.772
folA	-0.514	yahK	0.36
apaH	-0.421	prpB	0.754
apaG	-1.239	prpE	-0.97
rsmA	-0.944	codA	-0.747
pdxA	-1.18	cynR	-1.5
surA	-0.734	lacA	0.813
lptD	-0.564	yaiT	0.047
djlA	-0.776	ampH	-0.474
yabP	0.357	sbmA	0.093
rluA	-0.951	proC	-1.384
rapA	-0.806	aroM	-0.237
polB	-0.441	rdgC	-0.619
araD	-0.119	proY	-0.545
araA	-0.691	yajI	-0.641
araB	0.343	nrdR	-0.143
araC	-0.221	yajO	-0.798
yabI	-0.381	dxs	-0.572
thiQ	-0.916	panE	-0.302
thiP	0.125	ybaV	0.553
thiB	-0.297	queC	0.652
sgrR	-0.246	apt	-0.194
sgrS	-2.328	ybaL	-0.459
sgrT	0	ybaK	-0.896
setA	1.397	glsA	0.195
leuD	-1.147	rhsH	-0.066
leuC	-0.647	allS	-1.01
leuB	-0.276	ybbY	-0.082
leuA	-1.587	glxK	0.086
leuL	0	allE	0.192
leuO	0.216	allC	-0.635
ilvI	-0.216	cysS	-0.188
ilvH	-0.485	folD	-1.093
cra	-0.883	sfmF	0
mraZ	-0.316	emrE	0.686
rsmH	-0.665	rusA	0
ftsL	-0.594	nmpC	0.06
ftsI	-0.328	tfaD	-2.763
murE	-0.917	fepA	-0.382
murF	-0.44	fes	0.153
mraY	-0.962	entF	-0.98
murD	-0.239	fepC	-0.127
ftsW	-0.988	entE	-0.622
murG	-0.716	entB	-0.467
murC	-0.12	citF	0.363
ddlB	-0.273	ybeM	-1.187
ftsQ	0.693	holA	-0.121
ftsA	-0.297	djlB	0.182
ftsZ	-0.869	ybeU	1.845
lpxC	-1.06	ybeX	-0.518
secM	-0.428	umpH	-0.393
secA	-0.593	nagB	-0.682
mutT	-0.641	rhsC	-0.372
yacG	-0.22	abrB	-0.458
zapD	-0.505	ybgO	0.431
coaE	-0.559	ybgQ	-0.208
guaC	-0.563	mngB	0.066
hofC	-0.623	galE	-0.017
hofB	-1.028	bioC	0.808
ppdD	-0.838	uvrB	-0.713
nadC	-0.712	fiu	-0.159
ampD	0.205	rlmF	0.062
ampE	0.1	ybiU	-0.33
aroP	-0.798	ybiV	-0.357
pdhR	-0.796	moeA	-0.994
aceE	-0.78	potH	-1.332
aceF	-0.249	rlmC	-1.087
lpd	-0.796	artM	-0.268
yacH	-0.833	ybjT	-0.416
acnB	-0.849	hcr	-0.379
yacL	-0.762	macB	-0.004
speD	-0.03	ftsK	-0.515
speE	-0.046	dmsA	-0.651
yacC	0.127	ycaC	1.561
cueO	0.141	focA	-0.752
gcd	-0.903	aroA	0.283
hpt	0.281	ycaL	-0.63
can	-0.173	ihfB	-0.175
yadG	0.031	ycaI	0.131
yadH	-0.473	mukE	-0.14
yadI	0.019	mukB	-0.776
yadE	-0.19	ompF	0.012
panD	-0.214	pncB	-0.717
yadD	1.056	pepN	-0.467
panC	-0.129	ssuB	-0.198
panB	-0.641	ycbU	-0.497
yadC	0.719	ycbV	2.025
yadK	1.018	uup	-0.661
yadL	-0.603	ycbZ	-0.949
yadM	0.944	hyaA	-0.72
htrE	-0.148	appA	-0.846
yadV	0.814	etk	-0.497
yadN	-0.188	gfcD	-0.199
folK	-1.03	gfcA	-0.365
pcnB	-0.789	torS	-0.002
gluQ	-0.372	agp	-0.495
dksA	-1.081	efeB	-0.753
sfsA	0.295	phoH	0.187
ligT	-1.048	pgaB	0.25
hrpB	-0.449	ghrA	-0.56
mrcB	-0.797	csgE	-1.514
fhuA	-0.618	opgH	-0.938
fhuC	-0.844	yceK	-4.436
fhuD	-0.676	lpxL	-0.914
fhuB	-1.557	flgB	0.469
hemL	-1.003	flgK	-0.259
clcA	-0.916	rne	-0.799
erpA	0.511	rluC	-0.099
yadS	-0.517	fabD	-0.506
btuF	-1.19	acpP	-0.069
mtn	-1.056	ndh	-0.845
dgt	-0.346	ldtC	-0.325
degP	-0.651	mfd	-0.668
cdaR	-0.546	lolE	0.207
yaeH	-0.151	potC	0.464
yaeI	0.211	purB	-1.057
dapD	-0.856	mnmA	-0.713
glnD	-0.496	ymfD	-0.538
map	-0.239	aaaE	0.989
tff	0.378	stfP	0
rpsB	-0.235	tfaE	-0.679
tsf	-0.406	ycgI	2.188
pyrH	0.14	ycgL	0.485
frr	-0.498	dsbB	-0.896
dxr	-0.925	cvrA	-0.474
ispU	0.579	ldcA	-0.256
cdsA	-0.685	ycgR	-0.436
rseP	0.068	treA	-0.332
bamA	-0.215	dauA	-0.479
skp	-0.163	prs	-0.867
lpxD	-0.814	hemA	-1.202
fabZ	0.255	prmC	-0.59
lpxA	-0.683	narX	-0.753
lpxB	-0.3	purU	-0.086
rnhB	-0.688	rssB	0.053
dnaE	-0.935	oppF	-0.433
accA	-0.585	kch	0.487
ldcC	-0.332	trpC	-0.601
yaeR	0.479	trpE	0.245
tilS	-0.885	sohB	-0.022
rof	-0.329	acnA	-0.646
yaeP	-0.572	pyrF	-0.15
yaeQ	-0.23	puuD	0.147
arfB	-0.001	puuE	0
nlpE	0.681	ycjQ	-0.094
yaeF	-0.36	ycjT	-0.145
proS	-0.702	mpaA	-2.892
tsaA	-1.183	fnr	-0.48
rcsF	-0.225	abgB	-1.078
metQ	-0.377	abgA	0.201
metI	-0.103	ydaN	-0.705
metN	-0.659	dbpA	-0.732
gmhB	-0.28	ttcA	-0.457
rrsH	2.189	stfR	0.529
ileV	-2.609	tfaR	-0.131
alaV	-1.925	paaZ	-0.237
rrlH	1.088	ydbA	0.561
rrfH	-1.026	hrpA	-0.582
aspU	-2.42	opgD	-0.073
dkgB	0.084	ydcR	0.114
yafC	-0.961	patD	0.137
yafD	-0.772	curA	0.435
yafE	0.018	nhoA	-0.845
mltD	-0.309	narZ	0.124
gloB	0.392	fdnG	-0.731
yafS	-0.158	fdnH	-0.615
rnhA	-0.802	gadC	0.073
dnaQ	-0.186	yneO	0.31
aspV	-1.304	ydeA	0.008
yafT	0.545	dcp	0.298
ykfM	0	ydfJ	0.078
yafU	-1.599	tfaQ	1.044
yafF	-2.657	quuQ	-0.91
yafV	-0.39	ydfE	-0.039
ivy	0.287	intQ	0.219
fadE	0.274	rspA	-0.086
gmhA	-0.276	pntA	-0.238
yafJ	-0.731	ydgH	-0.721
yafK	-0.308	ydgC	-0.775
yafQ	-0.533	uidB	-0.309
dinJ	-0.374	add	-0.778
yafL	-0.397	rsxC	-0.342
rayT	-0.079	nth	-0.556
lfhA	-0.444	ydhK	-0.182
lafU	-0.155	nemA	-0.092
dinB	-0.678	lhr	-0.53
yafN	0.718	mdtK	-0.449
yafO	0.786	ydhT	-1.877
yafP	-0.701	ydhW	-2.452
ykfJ	1.133	ldtE	-1.713
prfH	0	ydiJ	-0.314
pepD	-0.453	ydiK	-0.842
gpt	-0.491	ydiF	0.072
frsA	-0.729	ydiQ	0.417
crl	-0.549	pheS	-0.705
phoE	1.317	ydjM	-0.031
proB	-0.704	katE	-0.522
proA	-0.931	chbF	-0.835
thrW	0	chbR	0.978
ykfN	0	chbC	-0.018
ykfI	0	nadE	-0.32
yafW	0	cho	-1.156
ykfH	0	astD	0.87
ykfG	0	astC	0.329
yafX	0	topB	-0.688
ykfF	1.827	ansA	0.026
ykfB	-2.046	ydjL	1.722
yafY	0.888	msrB	0.501
ykfL	-1.396	yeaI	0.184
ykfK	0	fadD	-0.442
yafZ	-0.364	yeaY	-0.152
ykfA	-0.268	tsaB	-1.117
perR	0.887	nudL	-1.54
insN	0.494	rlmA	-0.265
insI1	0.459	prc	-0.408
eyeA	-5.474	yebT	-0.57
ykfC	-0.548	ptrB	-0.207
insH1	-0.257	eda	-1.034
mmuP	0.433	mepM	-0.348
mmuM	-0.261	znuB	0.3
afuC	-1.148	aspS	-1.148
afuB	-0.193	cmoA	-0.899
insB1	-0.456	torY	-0.574
insA	-1.832	yecM	-1.107
insI1	-0.748	flhA	-0.631
insX	0.187	tap	-1.091
yagB	1.191	cheA	-0.153
yagA	0	motA	-0.86
yagE	-1.811	otsB	-0.203
yagF	0.063	araG	-1.167
yagG	-0.836	yecA	0.082
yagH	-0.744	uvrC	-0.675
yagI	-0.841	yedL	0.264
argF	-0.008	fliM	-0.889
ykgS	0.526	yedA	-0.599
insB1	-0.65	vsr	-0.063
insA	0.207	yeeJ	-0.617
yagJ	-1.386	yeeL	0.09
yagK	0.567	shiA	-0.376
yagL	0.143	yeeN	0.949
yagM	0.396	nac	-0.529
yagN	0.535	cobS	-0.27
intF	0.234	flu	-0.686
ptwF	0	sbmC	0.959
yagP	0.555	yeeY	-0.327
ykgT	0	hisD	-0.743
paoD	-0.381	hisB	-0.614
paoC	0.105	hisA	-0.739
paoB	-0.463	glf	1.267
paoA	-1.858	wzxC	-0.434
yagU	-0.2	wzb	0
ykgJ	1.397	yegH	-0.708
ecpE	-2.481	yegE	-1.104
ecpD	-0.293	yegK	-0.964
ecpC	-0.294	mdtA	0.314
ecpB	-0.587	mdtB	-1.605
ecpA	-1.128	yegQ	-0.761
ecpR	-1.154	gatY	-0.345
ykgL	-2.062	yegU	-0.289
ykgO	-1.83	yegV	-0.824
ykgM	0.556	mrp	-0.715
ykgR	0	metG	-0.866
ykgP	0	yehT	-0.456
eaeH	0	yehY	-0.912
insE1	-1.626	mglC	-0.666
insF1	0.307	lysP	-0.721
ykgA	0.049	fruA	-0.612
ykgQ	0	rtn	0.053
rclC	0.223	bcr	-0.599
rclB	0.502	narP	-0.658
rclA	-0.348	napH	-0.838
rclR	1.719	napA	-0.379
ykgE	-0.671	mqo	-0.514
ykgF	-0.523	yojI	0.166
ykgG	0.499	rcsD	-0.322
ykgH	0.391	atoA	0
betA	-0.765	yfaQ	-0.109
betB	-0.833	glpB	-0.165
betI	-0.722	glpC	-1.197
betT	-0.969	arnB	-0.155
yahA	0.109	arnD	-0.475
yahB	-0.145	arnT	-1.007
yahC	-1.126	menF	-0.506
yahD	-1.761	nuoM	-1
yahE	0.772	nuoJ	-0.549
yahF	0.84	nuoC	-0.497
yahG	0.302	yfbS	-0.577
yahI	-1.099	yfbT	-1.034
yahJ	0.059	pta	-0.848
yahK	0.36	cvpA	-0.886
yahL	-0.53	accD	-1.18
yahM	0.114	truA	-1.02
yahN	-0.586	yfcJ	-0.75
yahO	1.032	smrB	-0.827
prpR	0.566	yfcS	0.104
prpB	0.754	yfcZ	-1.002
prpC	0.643	fadL	-0.299
prpD	0.619	dsdA	-0.747
prpE	-0.97	yfdE	0.617
codB	-0.662	fryA	-0.903
codA	-0.747	fryC	-0.536
cynR	-1.5	xapA	0
cynT	-0.631	ligA	-0.429
cynS	0.122	ptsI	-0.663
cynX	-0.343	eutR	-0.207
lacA	0.813	eutB	-0.607
lacY	1.301	eutH	0
lacZ	-1.216	eutJ	-0.409
lacI	-0.352	eutE	-0.827
mhpR	-0.756	tktB	-0.374
mhpA	0	aegA	-0.71
mhpB	0	ypfJ	-0.544
mhpC	-0.876	purC	-0.378
mhpD	0.786	hyfD	-0.324
mhpF	-1.099	bamB	-1.106
mhpE	-0.336	pbpC	-0.851
mhpT	0.46	sseB	0.248
yaiL	-0.423	pepB	-0.451
frmB	-0.001	hscA	-0.626
frmA	-0.618	iscS	-0.513
frmR	-1.09	hcaE	0.038
yaiO	-0.561	yphB	-1.212
yaiX	0.907	yphC	-0.577
insC1	0.327	yphG	0.274
insD1	-0.485	glrR	-0.019
yaiP	-1.098	yfhG	-1.585
yaiS	0	glrK	-0.357
tauA	0.709	purL	-0.46
tauB	-1.272	mltF	-0.342
tauC	0	lepA	-0.327
tauD	-1.186	yfiH	-0.142
hemB	-0.895	tyrA	-0.02
yaiT	0.047	rimM	-0.849
insF1	0.124	nadK	-0.556
insE1	-0.347	ypjA	-0.091
yaiV	0	ypjC	0.919
ampH	-0.474	gabD	-0.585
sbmA	0.093	gabP	-0.305
yaiW	-0.968	ygaU	-0.562
yaiY	1.053	ygaY	-0.534
yaiZ	-0.24	emrB	-1.016
ddlA	-0.557	mltB	-0.541
iraP	0.924	srlA	-0.535
phoA	-0.9	srlM	1.133
psiF	-2.132	norV	-0.54
yaiC	-0.35	hydN	-1.426
proC	-1.384	hycB	-0.671
yaiI	-0.882	ygbL	-0.185
aroL	0.045	rpoS	-0.049
yaiA	-0.218	cysD	0.259
aroM	-0.237	ygbF	0.29
yaiE	-0.419	casB	0.875
ykiA	-0.99	casA	0.539
rdgC	-0.619	ygcR	0.534
mak	-1.091	ygcS	-0.624
araJ	-0.957	ygcE	0.359
sbcC	-0.624	queE	-0.621
sbcD	-0.162	mazG	-0.428
phoB	-0.113	rlmD	-0.473
phoR	-0.156	ygdG	-1.098
brnQ	-1.085	fucO	-0.513
proY	-0.545	csdA	-0.684
malZ	0.477	argA	-0.428
acpH	-0.778	mutH	-1.258
queA	-0.619	tas	-0.531
tgt	-0.768	lysA	0.125
yajC	-0.337	araE	-0.323
secD	-0.622	ygeK	-0.397
secF	-0.49	ygeY	-0.622
yajD	0.74	guaD	0.582
tsx	-0.534	ygfS	-2.233
yajI	-0.641	bglA	-0.457
nrdR	-0.143	tktA	-0.852
ribD	-0.818	yggL	-0.213
ribE	-0.919	nupG	-0.409
nusB	-0.587	pitB	-1.858
thiL	0.153	hybC	-1.034
pgpA	-0.872	yghX	0.311
yajO	-0.798	yqhA	-0.298
dxs	-0.572	yghA	0.263
ispA	-0.374	yqhC	-0.009
xseB	0.208	dkgA	-0.211
thiI	-0.311	parC	-0.725
yajL	0.974	bacA	-0.22
panE	-0.302	rpoD	-0.471
yajQ	0.097	ygjH	0.386
yajR	-0.895	ebgR	-0.233
cyoE	-0.844	ygjI	0.864
cyoD	-1.29	ygjK	-0.65
cyoC	-0.134	fadH	-1.077
cyoB	-0.707	ygjQ	0.063
cyoA	-0.549	uxaA	-0.759
ampG	-0.846	yhaH	-0.43
yajG	0.364	yhaK	0.256
bolA	1.456	yhaC	-0.338
tig	-0.644	garK	-1.329
clpP	-0.332	garD	-0.765
clpX	-0.72	kbaY	0.766
lon	-0.66	yraJ	0.58
hupB	-0.592	yraQ	-0.215
ppiD	-0.149	yhbO	1.123
ybaV	0.553	yhbP	-0.683
fadM	-0.48	yhbS	-0.256
queC	0.652	pnp	-0.413
ybaE	-0.535	infB	-0.373
cof	-0.414	nusA	-0.377
ybaO	-1.073	obgE	-0.903
mdlA	0.049	rpmA	-0.848
mdlB	-0.66	ptsN	-0.531
glnK	-0.194	arcB	-0.258
amtB	-0.142	gltB	-0.801
tesB	-0.619	yhcE	0.79
ybaY	-1.336	dcuD	0.583
ybaZ	-2.496	sspB	-1.096
ffs	-2.878	yhcB	-0.784
ybaA	-0.797	yhdN	-0.389
ylaB	0.071	gspB	-0.125
ylaC	-0.393	slyD	-0.848
maa	-0.375	argD	-0.819
hha	-0.045	pabA	-0.785
tomB	-0.038	yhfS	0.088
acrB	-0.641	yhfX	-0.483
acrA	-0.599	hofM	-2.072
acrR	-0.295	mrcA	-0.731
mscK	-0.632	malQ	-0.685
ybaM	-0.232	malP	-0.216
priC	-0.898	malT	-0.811
ybaN	-0.804	glpD	-0.712
apt	-0.194	glgP	-0.45
dnaX	-0.656	glgA	-0.659
ybaB	-1.272	livH	-0.345
recR	0.455	livJ	-0.701
htpG	0.406	dcrB	-0.616
adk	0.137	rbbA	-1.043
hemH	-0.937	yhiI	-0.696
aes	-0.734	yhiL	1.296
gsk	0.541	uspB	1.034
ybaL	-0.459	yhiS	-0.332
fsr	-0.354	dctA	0.399
ushA	-0.137	yhjK	-0.552
ybaK	-0.896	bcsC	-0.612
chiX	0	bcsA	-0.966
ybaP	-0.947	eptB	-0.123
ybaQ	-0.029	xylB	-0.353
copA	-0.723	xylF	-0.098
glsA	0.195	avtA	-0.046
ybaT	1.024	ysaA	-0.197
cueR	-2.659	yiaN	0.564
ybbJ	0.57	lyxK	-1.429
qmcA	-0.798	yiaU	0.05
fetA	-0.941	lldR	-1.339
fetB	0.181	cysE	-0.61
ybbN	-0.562	tdh	-0.7
ybbO	-0.92	kbl	-0.462
tesA	-0.349	waaC	-0.849
ybbA	-0.796	waaB	0.357
ybbP	-0.424	waaG	-0.039
rhsD	0.077	coaD	-0.851
ybbC	-3.435	mutM	-0.467
rhsH	-0.066	gmk	-0.069
ybbD	0.37	spoT	-0.491
ylbI	2.922	trmH	-1.245
ylbG	-1.609	uhpC	-0.832
mnmH	-0.52	yidP	-1.818
allS	-1.01	yidX	1.499
allA	0.373	gyrB	-0.092
allR	0.502	dnaN	-0.879
gcl	0.163	atpD	-1.214
hyi	0.838	atpI	0.146
glxR	-0.498	asnA	-0.631
ybbW	0.88	viaA	-0.085
allB	0.079	kup	-0.133
ybbY	-0.082	rbsA	-0.507
glxK	0.086	rbsB	-0.645
allE	0.192	rbsR	-0.768
allC	-0.635	ilvY	-0.536
allD	-1.025	gpp	-0.773
fdrA	-0.52	wecE	0.256
ylbE	0.4	yifK	-0.783
ylbF	0	dapF	-0.632
ybcF	0.013	corA	-0.553
purK	-0.618	ubiB	-0.146
purE	-1.581	hemN	-0.312
lpxH	-1.104	yihQ	-1.047
ppiB	-0.526	yihS	0.011
cysS	-0.188	yiiD	-0.014
ybcI	-0.175	frvR	-0.16
ybcJ	-0.153	rhaD	-0.849
folD	-1.093	rhaT	0.352
sfmA	-0.737	cpxA	-0.345
sfmC	0	tpiA	-0.233
sfmD	-0.283	hslU	-0.174
sfmH	0	hslV	-0.353
sfmF	0	cytR	0.034
sfmZ	0.323	frwA	-0.8
argU	0	rplA	-1.173
intD	0.122	rplJ	-1.122
xisD	1.909	rpoB	-0.77
exoD	-1.2	thiG	0.787
peaD	0.567	purD	-0.596
renD	0.628	purH	-0.595
insE1	-0.688	aceA	-0.987
insF1	0.394	metH	-0.535
emrE	0.686	yjbH	0.688
ybcK	-0.374	psiE	0
ybcL	0.153	lamB	-0.326
ybcM	-0.559	plsB	-0.92
ylcH	0	zur	-0.402
ybcN	0	acs	0.325
ninE	2.194	yjcS	-0.449
ybcO	0.467	phnM	-0.399
rusA	0	phnD	0.712
ylcG	0	proP	-0.168
quuD	-0.155	dcuB	-0.162
nmpC	0.06	cadA	0.215
insH1	0.114	dcuA	0.256
essD	-1.292	aspA	-0.123
rrrD	0.709	frdA	-1.257
rzpD	-1.793	epmA	-0.461
rzoD	2.118	mscM	-0.779
borD	-0.206	hflK	-0.905
ybcV	0.404	nsrR	-0.682
ybcW	0.619	ulaC	-0.527
ylcI	0	cpdB	0.191
nohD	-0.134	mpl	-0.448
aaaD	0	yjgA	0.628
tfaD	-2.763	pmbA	-0.727
ybcY	0.56	treC	-0.189
tfaX	0	treR	0.003
appY	0.81	valS	-0.73
ompT	0.635	pepA	-0.802
pauD	0	yjgR	-0.22
envY	-0.905	fecB	-1.136
ybcH	-1.391	fecA	-0.273
nfrA	-0.884	yjhZ	0
nfrB	-0.238	fimE	0.339
cusS	-0.234	fimG	0.641
cusR	-0.355	iadA	-1.156
cusC	-0.08	yjiV	0.373
cusF	-1.062	mcrB	0.037
cusB	-0.31	yjiY	-0.849
cusA	-1.129	lgoD	0
pheP	-1.27	fhuF	-0.727
ybdG	-0.096	yjjV	-0.756
nfsB	-0.467	yjjI	-0.618
ybdF	0.513	deoC	-0.304
ybdJ	-0.227	serB	-0.65
ybdK	-1.123	arcA	-0.844
sokE	0	yjtD	-0.006
hokE	0
insL1	-0.264
entD	0.479
fepA	-0.382
fes	0.153
ybdZ	-0.155
entF	-0.98
fepE	-0.712
fepC	-0.127
fepG	-2.068
fepD	-0.66
entS	-1.133
fepB	0.19
entC	-1.226
entE	-0.622
entB	-0.467
entA	-0.603
entH	-1.081
cstA	-1.014
ybdD	-2.697
ybdH	-0.606
ybdL	-0.599
ybdM	-0.041
ybdN	0.703
ybdO	0.143
dsbG	0.169
ahpC	0.29
ahpF	-0.899
uspG	-0.694
ybdR	0.441
rnk	-0.679
rna	-0.067
citT	-0.268
citG	0
citX	0
citF	0.363
citE	-0.484
citD	0
citC	0
citA	-0.472
citB	-0.463
dcuC	-1.1
pagP	1.493
cspE	-0.796
flc	-0.337
ybeM	-1.187
tatE	-1.11
lipA	-0.37
ybeF	-0.872
lipB	-0.685
ybeD	-1.33
dacA	-0.438
rlpA	-0.847
mrdB	-0.692
mrdA	-0.53
rlmH	-1.318
rsfS	-0.917
cobC	-0.015
nadD	-0.495
holA	-0.121
lptE	-1.063
leuS	-0.413
ybeL	-0.17
ybeQ	-0.377
ybeR	0
djlB	0.182
ybeT	0
ybeU	1.845
djlC	0.997
hscC	0.116
rihA	-0.339
gltL	-0.61
gltK	-0.383
gltJ	0.074
gltI	-0.539
insH1	-0.113
lnt	-1.313
ybeX	-0.518
ybeY	-0.628
ybeZ	-0.678
miaB	-0.902
ubiF	-0.845
glnX	-2.175
glnV	-1.096
metU	-2.492
glnW	-2.209
glnU	-2.275
leuW	-2.16
metT	-0.903
asnB	-0.634
umpH	-0.393
nagC	0.113
nagA	-0.546
nagB	-0.682
nagE	-0.365
glnS	-0.613
chiP	-0.403
chiQ	1.65
fur	-0.658
uof	2.105
fldA	0.002
ybfE	-0.703
ybfF	-0.401
seqA	-0.192
pgm	-0.912
ybfP	-0.06
ybfG	0.318
ybfI	0
potE	-0.589
speF	-0.579
ybfK	0
kdpE	-0.086
kdpD	-0.69
kdpC	-0.525
kdpB	-0.475
kdpA	-1.117
kdpF	0
ybfA	-1.177
rhsC	-0.372
ybfB	1.521
rhsO	0.543
ybfC	1.367
ybfQ	0
ybfL	-0.399
ybfD	1.208
ybgA	0.149
phr	-0.252
dtpD	-0.994
ybgI	-0.735
ybgJ	-0.767
ybgK	-0.387
ybgL	-0.901
nei	-1.043
abrB	-0.458
ybgO	0.431
ybgP	1.128
ybgQ	-0.208
ybgD	-0.712
gltA	-0.435
sdhC	-0.577
sdhD	0.366
sdhA	-0.683
sdhB	-0.728
sucA	-0.118
sucB	-1.386
sucC	-0.514
sucD	-0.737
mngR	0.282
mngA	0.154
mngB	0.066
cydA	-0.648
cydB	-0.651
cydX	-0.362
ybgE	0.128
ybgC	-0.129
tolQ	0.286
tolR	-0.555
tolA	-0.564
tolB	-0.298
pal	-0.796
ybgF	-0.496
lysT	-3.45
valT	-1.629
lysW	-1.683
valZ	-1.359
lysY	-3.025
lysZ	-3.025
lysQ	-1.639
nadA	-0.672
pnuC	-0.721
zitB	-1.372
ybgS	0
aroG	0.458
gpmA	-0.287
galM	-0.511
galK	-0.741
galT	-0.904
galE	-0.017
modF	-0.523
modE	-0.584
acrZ	0.074
modA	-0.681
modB	-0.606
modC	-0.462
ybhA	0.278
pgl	-0.17
ybhD	0.976
ybhH	-0.094
ybhI	0
ybhJ	-1.073
ybhC	-0.746
ybhB	-1.309
bioA	-0.371
bioB	-1.381
bioF	0.89
bioC	0.808
bioD	-0.577
uvrB	-0.713
ybhK	-0.078
moaA	-0.762
moaB	-0.477
moaC	0.49
moaD	-1.847
moaE	-0.15
ybhL	-0.149
ybhM	2.371
ybhN	0.25
clsB	0.082
ybhP	0.821
ybhQ	-0.646
ybhR	-1.347
ybhS	-1.056
ybhF	-0.569
ybhG	0.498
ybiH	-1.007
rhlE	-0.521
ybiA	-1.025
dinG	-0.94
ybiB	-0.961
ybiC	0.752
ybiJ	-0.851
ybiI	-0.174
ybiX	-0.095
fiu	-0.159
mcbA	0.68
rlmF	0.062
ybiO	0.012
glnQ	-0.858
glnP	-1.616
glnH	-0.318
dps	-0.601
rhtA	-0.345
ompX	-0.446
opgE	-0.382
mntS	-0.05
mntR	-1.205
ybiR	-0.396
ldtB	-0.005
ybiT	-0.549
ybiU	-0.33
ybiV	-0.357
ybiW	0.008
ybiY	-0.488
fsaA	1.424
moeB	-0.161
moeA	-0.994
iaaA	0.162
gsiA	-0.918
gsiB	-1.071
gsiC	-0.085
gsiD	-0.904
yliE	0.115
yliF	0.674
rimO	-0.4
bssR	1.348
yliI	-0.35
gstB	0.198
dacC	-0.399
deoR	-1.014
ybjG	-0.715
mdfA	0.281
ybjH	-2.924
ybjI	0.076
ybjJ	-1.019
rcdA	-0.225
rybB	0
ybjL	-0.561
ybjM	-1.392
grxA	-0.489
ybjC	-0.021
nfsA	-0.374
rimK	-0.483
ybjN	-0.475
potF	-1.122
potG	0.282
potH	-1.332
potI	-1.36
ybjO	-1.34
rlmC	-1.087
artJ	-0.118
artM	-0.268
artQ	-1.368
artI	0.159
artP	-0.54
ybjP	0.215
ybjQ	-0.073
amiD	-0.405
ybjS	-0.62
ybjT	-0.416
ltaE	-1.542
poxB	0.084
hcr	-0.379
hcp	-0.057
ybjE	-0.258
aqpZ	0.47
ybjD	-0.541
ybjX	-0.04
macA	0.149
macB	-0.004
cspD	0.479
clpS	1.705
clpA	-0.752
serW	-3.206
infA	-0.546
aat	-1.569
cydC	0.042
cydD	-0.026
trxB	-0.686
lrp	-0.541
ftsK	-0.515
lolA	-0.518
rarA	-0.802
serS	-0.71
dmsA	-0.651
dmsB	-0.586
dmsC	0.137
ycaC	1.561
ycaD	-0.626
ycaM	-0.274
ycaN	-0.182
ycaK	-0.169
pflA	-1.415
pflB	-0.781
focA	-0.752
ycaO	-0.561
ycaP	-0.943
serC	-1.026
aroA	0.283
ycaL	-0.63
cmk	-0.443
rpsA	-0.609
ihfB	-0.175
ycaI	0.131
msbA	-0.351
lpxK	-1.167
ycaQ	-0.063
ycaR	0.052
kdsB	-0.656
ycbJ	-0.009
elyC	-1.508
smtA	-0.089
mukF	-0.21
mukE	-0.14
mukB	-0.776
ldtD	-0.535
ycbK	-0.097
ycbL	-0.194
aspC	-0.886
ompF	0.012
asnS	-0.425
pncB	-0.717
pepN	-0.467
ssuB	-0.198
ssuC	0.826
ssuD	0.086
ssuA	-0.811
ssuE	-0.704
elfA	-0.788
elfD	-0.6
elfC	0.156
elfG	-0.184
ycbU	-0.497
ycbV	2.025
ycbF	-0.641
pyrD	-0.338
zapC	0.586
ycbX	-0.26
rlmL	-0.829
uup	-0.661
pqiA	-0.064
pqiB	0.178
pqiC	0.357
rmf	-4.748
fabA	-0.68
ycbZ	-0.949
matP	-0.432
ompA	-0.716
sulA	-0.516
sxy	1.397
yccS	-0.93
yccF	0.282
helD	-0.595
mgsA	-0.419
yccT	0
yccU	-0.849
hspQ	-1.542
rlmI	-0.467
yccX	-0.864
tusE	-1.297
yccA	-0.562
serT	-2.355
hyaA	-0.72
hyaB	-0.265
hyaC	0.302
hyaD	-1.158
hyaE	1.341
hyaF	0.396
cbdA	0.648
cbdB	-0.773
cbdX	0.709
appA	-0.846
etk	-0.497
etp	0.42
gfcE	0.056
gfcD	-0.199
gfcC	-0.634
gfcB	-0.886
gfcA	-0.365
insA	-1.241
insB1	-1.121
cspH	0.51
cspG	0.503
ymcE	0.198
gnsA	0.603
yccM	0.712
torS	-0.002
torT	-1.52
torR	-2.237
torC	1.031
torA	-0.214
torD	-1.211
cbpM	-0.581
cbpA	-0.387
yccE	0.492
agp	-0.495
yccJ	-0.929
wrbA	-1.62
ymdF	0.925
rutG	0.266
rutF	0
rutE	1.025
rutD	-0.111
rutC	0
rutB	0
rutA	0.616
rutR	0.223
putA	-0.885
putP	-0.612
efeU	-0.463
efeO	0.002
efeB	-0.753
phoH	0.187
pgaD	0.145
pgaC	-0.418
pgaB	0.25
pgaA	-0.029
ycdT	0.656
insF1	0.762
insE1	-1.331
ymdE	0
ycdU	2.267
serX	0
ghrA	-0.56
ycdX	-0.629
ycdY	-0.371
ycdZ	0.91
csgG	-0.108
csgF	0
csgE	-1.514
csgD	0.821
csgB	1.227
csgA	-0.145
csgC	-1.062
ymdA	0
ymdB	1.165
clsC	-0.546
opgC	0.089
opgG	0.013
opgH	-0.938
yceK	-4.436
msyB	0.094
mdtG	-0.43
lpxL	-0.914
yceA	-0.267
yceI	0.396
yceJ	0.539
yceO	2.416
solA	-0.546
bssS	-0.708
dinI	-1.9
pyrC	-0.881
yceB	-0.15
grxB	-0.771
mdtH	0.683
rimJ	-0.178
yceH	-0.311
yceM	-0.583
murJ	-0.079
flgN	-1.03
flgM	0.913
flgA	0.016
flgB	0.469
flgC	-0.444
flgD	-0.421
flgE	-0.669
flgF	-1.285
flgG	-0.944
flgH	0.107
flgI	-1.405
flgJ	-0.31
flgK	-0.259
flgL	-0.045
rne	-0.799
yceQ	0
rluC	-0.099
yceF	-0.166
psrD	-2.402
yceD	-0.454
rpmF	-1.034
plsX	-0.838
fabH	-0.447
fabD	-0.506
fabG	-0.302
acpP	-0.069
fabF	-0.67
pabC	-0.303
yceG	-0.416
tmk	-0.795
holB	-0.718
ycfH	-0.582
ptsG	-1.011
fhuE	-0.975
hinT	-0.833
ycfL	-0.574
lpoB	-0.417
thiK	-0.662
nagZ	-0.777
ycfP	0.218
ndh	-0.845
ycfJ	-0.368
ycfQ	-0.658
bhsA	0.154
ldtC	-0.325
mfd	-0.668
ycfT	0
lolC	-0.403
lolD	-0.895
lolE	0.207
nagK	-0.564
cobB	-0.276
ycfZ	0.094
ymfA	0.384
potD	-0.328
potC	0.464
potB	-0.765
potA	-0.664
pepT	-0.633
roxA	-0.415
phoQ	-0.282
phoP	0.187
purB	-1.057
hflD	-1.195
mnmA	-0.713
nudJ	0.01
rluE	-0.35
icd	-0.636
ymfD	-0.538
ymfE	0.824
lit	-0.4
intE	0.482
xisE	0
ymfI	-0.089
ymfJ	-1.119
cohE	0.221
croE	0
ymfL	0
ymfM	0
oweE	-1.349
aaaE	0.989
ymfR	0
beeE	0
jayE	-1.732
ymfQ	-1.162
stfP	0
tfaP	0.402
tfaE	-0.679
stfE	0.366
pinE	-1.852
mcrA	1.169
icdC	0
iraM	0.711
ycgX	-1.28
bluR	-0.028
bluF	0.685
ycgZ	2.097
ymgA	0.92
ariR	0.635
ymgC	-0.205
ycgG	-0.563
ymgF	0.654
ycgH	0.1
ymgD	0.523
ymgG	-1.089
ymgI	0.551
ymgJ	0
ycgI	2.188
minE	0.184
minD	-0.439
minC	-0.497
ycgJ	-0.768
pliG	0.84
ycgL	0.485
ycgM	0.198
ycgN	-0.307
hlyE	0.258
umuD	0.424
umuC	-0.843
dsbB	-0.896
nhaB	-0.98
fadR	-0.07
ycgB	0.076
dadA	-0.263
dadX	-0.26
cvrA	-0.474
ldcA	-0.256
emtA	0.062
ycgR	-0.436
ymgE	-3.018
ycgY	2.368
treA	-0.332
dhaM	-0.355
dhaL	0.24
dhaK	-0.595
dhaR	-0.257
ycgV	0.091
ychF	-0.767
pth	0.011
ychH	-1.969
dauA	-0.479
prs	-0.867
ispE	-0.432
lolB	-0.462
hemA	-1.202
prfA	0.049
prmC	-0.59
ychQ	0.038
ychA	-0.66
kdsA	-0.511
ldrA	-0.21
rdlA	0
ldrB	-2.122
rdlB	0
ldrC	3.624
rdlC	0
chaA	-0.52
chaB	-1.277
chaC	-0.458
ychN	0.375
ychO	-0.133
narL	-0.542
narX	-0.753
narK	-0.58
narG	-0.33
narH	-0.259
narJ	0.502
narI	-0.721
rttR	-1.261
tpr	2.963
tyrV	-2.098
tyrT	-2.411
purU	-0.086
ychJ	-0.582
rssA	-0.54
rssB	0.053
galU	-0.273
hns	0.154
tdk	0.945
insZ	-1.232
adhE	-0.348
ychE	0.698
oppA	0.367
oppB	-0.385
oppC	-0.721
oppD	-0.468
oppF	-0.433
yciU	-0.555
clsA	-0.486
yciY	-1.656
kch	0.487
yciI	0.407
tonB	-1.092
yciA	-0.717
yciB	-1.225
yciC	-0.197
ompW	0.387
yciE	0.993
yciF	-0.785
yciG	0
trpA	-0.445
trpB	-0.309
trpC	-0.601
trpD	-1.446
trpE	0.245
trpL	0
yciV	0.025
yciO	0.285
yciQ	0.127
rluB	-0.998
btuR	-0.189
yciK	-1.213
sohB	-0.022
yciN	0.029
topA	-0.482
cysB	0.408
ymiA	-1.676
yciX	-0.237
acnA	-0.646
ribA	-0.401
pgpB	0.759
yciS	0.562
yciM	-0.626
pyrF	-0.15
yciH	0.12
osmB	-0.776
yciT	0.554
yciZ	-0.612
gmr	0.045
ymiB	0
rnb	-0.781
yciW	-0.02
fabI	-0.872
ycjD	0.622
sapF	-0.699
sapD	-0.263
sapC	-0.26
sapB	-0.945
sapA	-1.085
ymjA	-0.572
puuP	0.226
puuA	-0.16
puuD	0.147
puuR	0.085
puuC	-0.484
puuB	0.608
puuE	0
pspF	-0.802
pspA	0.125
pspB	0.675
pspC	0.655
pspD	-0.932
pspE	0.146
ycjM	1.071
ycjN	1.176
ycjO	0.264
ycjP	-1.654
ycjQ	-0.094
ycjR	-0.421
ycjS	-0.174
ycjT	-0.145
ycjU	-0.729
ycjV	0.23
ompG	0
ycjW	-0.155
ycjX	-0.629
ycjF	0.046
tyrR	-0.323
tpx	-0.848
ycjG	0.588
mpaA	-2.892
ymjC	2.442
ymjD	0
ycjY	-0.629
pgrR	-0.125
mppA	0.154
ynaI	0.282
insH1	-0.12
ynaJ	0.202
uspE	0.186
fnr	-0.48
ogt	-1.396
abgT	0.232
abgB	-1.078
abgA	0.201
abgR	0.441
mcaS	0
smrA	0.623
ydaM	0.135
ydaN	-0.705
fnrS	-2.794
dbpA	-0.732
ttcA	-0.457
intR	0.585
ydaQ	0
ydaC	-3.708
ralA	0
ralR	2.048
recT	-0.018
recE	0.19
racC	1.685
ydaE	-1.64
kilR	-1.396
sieB	0
ydaF	2.299
ydaG	0.315
racR	0.199
ydaS	1.613
ydaT	1.068
ydaU	-0.038
ydaV	-0.376
ydaW	-0.043
rzpR	0.389
rzoR	0
trkG	1.329
ynaK	0.491
ydaY	1.566
tmpR	1.189
lomR	-0.152
insH1	-1.255
stfR	0.529
tfaR	-0.131
pinR	1.224
ynaE	0.544
ttcC	0
uspF	0.794
ompN	-0.754
micC	0
pfo	-0.652
ydbJ	-0.429
hslJ	0.229
ldhA	-0.378
ydbH	-0.61
ynbE	0.125
ydbL	0.464
feaR	-0.008
feaB	-0.256
tynA	-0.459
paaZ	-0.237
paaA	-0.474
paaB	0
paaC	0
paaD	0
paaE	1.099
paaF	0.014
paaG	0.316
paaH	-1.01
paaI	-1.835
paaJ	-0.959
paaK	-0.19
paaX	-0.147
paaY	0.288
ynbG	0
ydbA	0.561
insD1	-0.872
insC1	0.381
insI1	0.643
ydbC	-0.206
ydbD	-0.634
ynbA	0
ynbB	0
ynbC	-0.425
ynbD	-0.106
azoR	-0.221
hrpA	-0.582
ydcF	-0.054
aldA	0.186
gapC	0.581
cybB	-0.126
rydC	0
ydcA	-1.635
hokB	-4.162
mokB	-1.659
sokB	0
trg	0.134
ydcI	0.366
ydcJ	-0.842
opgD	-0.073
ydcH	0.896
rimL	0.373
ydcK	-0.307
tehA	-0.201
tehB	0.447
ydcL	-0.452
insP	0
insQ	0.141
ydcO	0.097
ydcN	0.133
ydcP	-0.363
yncJ	0.143
hicA	2.156
hicB	0.407
ydcR	0.114
ydcS	-0.81
ydcT	-0.457
ydcU	-0.346
ydcV	0.377
patD	0.137
yncL	0
ydcX	-0.313
ydcY	-0.551
ydcZ	-0.208
mnaT	-0.556
curA	0.435
mcbR	-1.152
yncD	-0.103
yncE	-0.155
ansP	-0.738
yncG	0
yncH	0
rhsE	0.902
ydcD	0.645
yncI	0.307
ydcC	-0.346
pptA	0.142
yddH	0.342
nhoA	-0.845
yddE	-0.349
narV	-0.947
narW	-0.604
narY	-1.401
narZ	0.124
narU	0
yddK	0.198
yddL	0
yddG	0.247
fdnG	-0.731
fdnH	-0.615
fdnI	-0.79
yddM	0.033
adhP	-0.437
maeA	-0.552
sra	-1.091
bdm	0
osmC	-1.059
ddpF	-1.901
ddpD	-1.503
ddpC	-0.038
ddpB	-0.772
ddpA	0.414
ddpX	-1.166
dosP	-0.161
dosC	-0.284
yddW	-0.02
gadC	0.073
gadB	-1.197
pqqL	-0.214
yddB	0.231
yddA	0.061
ydeM	-0.393
ydeN	0.09
ydeO	0.289
safA	0
ydeP	0.038
ydeQ	-0.471
ydeR	-0.042
ydeS	-1.475
ydeT	0.614
yneL	0
hipA	-0.609
hipB	0.226
yneO	0.31
lsrK	-0.667
lsrR	-0.482
lsrA	0.817
lsrC	0.238
lsrD	0.244
lsrB	0.718
lsrF	1.424
lsrG	-0.2
tam	-0.565
yneE	-1.119
uxaB	-0.032
yneF	-0.311
yneG	-0.236
glsB	0.11
sad	-0.225
yneJ	0.132
yneK	0.193
ydeA	0.008
marC	-0.667
marR	-0.09
marA	0.16
marB	-1.784
eamA	0.442
ydeE	-0.664
yneM	-2.036
mgrR	-4.534
dgcZ	0.333
ydeI	0.533
ydeJ	-0.764
dcp	0.298
ydfG	-0.532
rspR	-0.322
ydfZ	-0.115
ydfI	-0.403
ydfJ	0.078
ydfK	-0.388
pinQ	2.438
tfaQ	1.044
stfQ	-2.251
nohQ	0.86
ynfO	-1.349
ydfO	-0.85
gnsB	2.633
ynfN	1.355
cspI	1.06
rzpQ	1.379
rzoQ	-2.395
rrrQ	1.375
ydfR	-0.639
essQ	0.144
cspB	0.9
cspF	-0.277
quuQ	-0.91
ydfU	-0.136
rem	2.215
hokD	-3.12
relE	0.868
relB	0.527
ydfV	0
flxA	-0.195
intK	0.901
ydfX	-0.956
dicC	-1.36
dicA	-0.115
ydfA	0.567
ydfB	-0.767
ydfC	0.855
dicF	0
dicB	1.995
ydfD	2.065
ydfE	-0.039
insD1	-0.674
intQ	0.219
rspB	0.012
rspA	-0.086
ynfA	1.25
ynfB	0.463
speG	-0.088
ynfC	-0.124
ynfD	1.798
ynfE	-0.416
ynfF	0.325
ynfG	-0.324
ynfH	-1.472
dmsD	-0.049
clcB	-0.628
ynfK	-0.484
mlc	-0.402
ynfL	-0.726
ynfM	-0.398
asr	2.795
ydgU	-2.409
ydgD	-0.414
mdtI	-0.752
mdtJ	1.227
tqsA	-1.172
pntB	-0.5
pntA	-0.238
ydgH	-0.721
ydgI	-1.222
folM	-1.346
ydgC	-0.775
rstA	-0.539
rstB	-0.278
tus	-1.1
fumC	-0.19
fumA	-0.433
manA	-0.368
ydgA	-0.157
uidC	0.206
uidB	-0.309
uidA	-0.175
uidR	-0.126
hdhA	0.178
malI	-0.251
malX	0.244
malY	-0.294
add	-0.778
ydgJ	-0.672
blr	-1.392
cnu	0.54
ydgK	0.011
rsxA	-1.305
rsxB	0.107
rsxC	-0.342
rsxD	-0.478
rsxG	-1.241
rsxE	-1.474
nth	-0.556
dtpA	-0.935
gstA	-0.109
pdxY	-0.37
tyrS	-0.416
pdxH	-0.193
mliC	0.612
anmK	-0.841
slyB	-0.136
slyA	0.226
ydhI	-0.227
ydhJ	-0.004
ydhK	-0.182
sodC	-0.236
ydhF	-0.655
ydhL	0.249
nemR	-0.851
nemA	-0.092
gloA	-0.68
rnt	-0.62
lhr	-0.53
grxD	-0.941
mepH	-0.665
sodB	-0.317
ydhP	-0.935
ynhF	2.963
purR	-0.121
ydhB	-0.43
ydhC	-0.686
cfa	-0.435
ribC	0.145
mdtK	-0.449
ydhQ	0.075
valV	0
valW	0
ydhR	-0.163
ydhS	-0.315
ydhT	-1.877
ydhU	0.102
ydhX	-1.392
ydhW	-2.452
ydhV	-0.388
ydhY	0.982
ydhZ	-0.583
pykF	-0.524
lpp	-1.606
ldtE	-1.713
sufE	0.222
sufS	-0.761
sufD	0.044
sufC	-0.566
sufB	0.023
sufA	-0.567
rydB	-2.661
ydiH	-0.383
menI	-1.342
ydiJ	-0.314
ydiK	-0.842
rprA	-2.969
ydiL	0
ydiM	-0.086
ydiN	0
ydiB	-0.876
aroD	-0.616
ydiF	0.072
ydiO	0.2
ydiP	0.096
ydiQ	0.417
ydiR	0.094
ydiS	-0.705
ydiT	1.623
fadK	-0.526
ppsA	-0.526
ppsR	0.396
aroH	-0.855
ydiE	-1.092
ydiU	-0.201
ydiV	-0.066
nlpC	0.165
btuD	-0.509
btuE	0.184
btuC	-0.578
ihfA	-0.608
pheT	-0.44
pheS	-0.705
pheM	0
rplT	-0.667
rpmI	-0.222
infC	-0.897
thrS	-0.25
arpB	0.465
yniD	-0.731
ydiY	-0.206
pfkB	-0.799
ydiZ	1.745
yniA	-1.111
yniB	0.451
yniC	-0.315
ydjM	-0.031
ydjN	-0.945
ydjO	1.178
cedA	-0.686
katE	-0.522
chbG	-0.291
chbF	-0.835
chbR	0.978
chbA	-0.612
chbC	-0.018
chbB	0.618
osmE	-0.804
nadE	-0.32
cho	-1.156
ves	0
spy	-0.356
astE	-1.319
astB	-0.855
astD	0.87
astA	0
astC	0.329
xthA	-0.73
ydjX	-0.913
ydjY	0.436
ydjZ	-1.45
ynjA	0.873
ynjB	-1.054
ynjC	0.103
ynjD	-1.514
ynjE	-0.649
ynjF	-0.292
nudG	0.146
ynjH	0.478
gdhA	-1.141
ynjI	0.36
topB	-0.688
selD	-0.72
ydjA	-0.872
sppA	-0.234
ansA	0.026
pncA	-0.172
ydjE	-0.532
ydjF	-0.172
ydjG	0.013
ydjH	0.741
ydjI	0.225
ydjJ	-1.451
ydjK	0.612
ydjL	1.722
yeaC	0.202
msrB	0.501
gapA	-0.628
yeaD	-0.395
yeaE	-1.051
mipA	-0.223
yeaG	0.188
yeaH	0.011
yeaI	0.184
yeaJ	-0.22
yeaK	-0.827
yoaI	0
yeaL	-0.618
yeaM	-0.471
yeaN	-1.623
yeaO	-0.064
yoaF	0.077
yeaP	-0.135
yoaK	0.869
yoaJ	0.652
yeaQ	-2.318
yoaG	-2.794
yeaR	1.478
leuE	0.313
dmlR	-0.554
dmlA	-0.941
yeaV	0.187
yeaW	-0.091
yeaX	-0.099
rnd	-0.54
fadD	-0.442
yeaY	-0.152
tsaB	-1.117
yoaA	-0.908
yoaB	-0.357
yoaC	-0.323
yoaH	-0.494
pabB	-0.348
nudL	-1.54
sdaA	-0.748
yoaD	-0.061
yoaE	-1.423
manX	-0.703
manY	-0.321
manZ	0.069
yobD	-1.975
mntP	0.454
rlmA	-0.265
cspC	-0.336
yobF	0.487
yebO	0.471
mgrB	0.484
yobH	-2.138
kdgR	-0.013
yebQ	-0.002
htpX	-0.558
prc	-0.408
proQ	-0.957
msrC	0.194
yebS	-0.389
yebT	-0.57
rsmF	-0.323
yebV	0.939
yebW	-0.741
pphA	0.331
ryeA	-0.802
sdsR	-5.084
yebY	0.254
yebZ	-0.761
yobA	0.083
holE	0.884
yobB	0.105
exoX	-1.263
ptrB	-0.207
yebE	-1.079
yebF	-0.952
yebG	0.164
purT	-0.607
eda	-1.034
edd	-0.577
zwf	-0.4
yebK	-0.267
pykA	-0.526
lpxM	0.091
mepM	-0.348
znuA	-0.248
znuC	0.169
znuB	0.3
ruvB	-0.36
ruvA	0.552
yobI	0
yebB	0.92
ruvC	-1.357
yebC	-0.341
nudB	-0.74
aspS	-1.148
yecD	-0.189
yecE	-0.456
yecN	-0.514
cmoA	-0.899
cmoB	-0.675
torZ	-0.506
torY	-0.574
cutC	-0.941
yecM	-1.107
argS	-0.873
yecT	-0.433
flhE	-1.912
flhA	-0.631
flhB	-1.365
cheZ	-0.041
cheY	-0.154
cheB	-0.588
cheR	1.14
tap	-1.091
tar	-0.726
cheW	-1.887
cheA	-0.153
motB	0.456
motA	-0.86
flhC	-0.496
flhD	-0.632
insB1	-1.38
insA	-0.545
uspC	0.37
otsA	0.247
otsB	-0.203
araH	0.712
araG	-1.167
araF	-0.374
ftnB	-0.635
yecJ	-0.354
azuC	0.892
yecR	-1.082
ftnA	0.201
yecH	0.602
tyrP	-0.339
yecA	0.082
leuZ	-2.26
cysT	-0.81
glyW	0.65
pgsA	-0.556
uvrC	-0.675
uvrY	0.024
yecF	-0.037
sdiA	0.281
yecC	-0.291
yecS	-0.547
dcyD	-0.249
fliY	-0.251
fliZ	0.572
fliA	-0.158
fliC	-0.731
fliD	-0.268
fliS	1.08
fliT	-0.571
amyA	-0.7
yedD	-0.129
yedE	-0.913
yedF	0.411
yedK	0.242
yedL	0.264
yedN	1.059
intG	3.096
fliE	1.557
fliF	-0.363
fliG	0.469
fliH	-1.139
fliI	-1.039
fliJ	0.389
fliK	0.342
fliL	-0.181
fliM	-0.889
fliN	-0.861
fliO	-1.575
fliP	-0.435
fliQ	1.707
[truncated: 2,501 more rows]

## Sheet: Fig 4B
Data for Fig 4B. Fraction of pre-rRNA reads to the total mapped reads (extended version of Table 2)
Organism	Note	Mapped reads	Mapped on rRNA or Pre-rRNA
			5S rRNA	16S rRNA	23S rRNA	Pre-rRNA	Sub-total	%
P. aeruginosa	5 U Hybridase	26174448	4500	312841	1164705	242533	1724579	6.58879
		23088094	3399	56816	479347	173662	713224	3.08914
	10 U Hybridase	28748624	3954	167246	737542	276119	1184861	4.12145
		29991165	3557	13083	452044	402038	870722	2.90326
	with pre-rRNA probes	19868429	1106	4442	46126	14172	65846	0.33141
		21443360	889	41453	125739	12057	180138	0.840064

## Sheet: Fig 5B
Data for Fig 5B
Position of TEP in motif	Number of TEPs
1	0
2	0
3	0
4	0
5	0
6	0
7	0
8	0
9	0
10	0
11	0
12	0
13	0
14	2
15	5
16	10
17	21
18	38
19	16
20	17
21	0
22	0
23	0
24	0
25	0
26	0
27	0
28	0
29	1
30	0
31	0
32	0

## Sheet: Fig 6D
Data for Fig 6D
Position relative to start codon (nt)	5' end assigned	3' end assigned
-100	0.013	0.0154
-99	0.0149	0.0111
-98	0.0187	0.0078
-97	0.0156	0.0132
-96	0.0145	0.0174
-95	0.0223	0.0279
-94	0.0141	0.0179
-93	0.0084	0.0142
-92	0.008	0.017
-91	0.0071	0.0181
-90	0.0126	0.0171
-89	0.0137	0.0236
-88	0.0144	0.0148
-87	0.0164	0.0153
-86	0.0223	0.018
-85	0.0124	0.0223
-84	0.0194	0.0157
-83	0.0188	0.0191
-82	0.019	0.0234
-81	0.0174	0.023
-80	0.0121	0.0114
-79	0.0158	0.0174
-78	0.0108	0.0189
-77	0.0133	0.0233
-76	0.0165	0.0182
-75	0.0246	0.0237
-74	0.02	0.0199
-73	0.0155	0.0187
-72	0.0255	0.0169
-71	0.0249	0.0091
-70	0.0203	0.0187
-69	0.0192	0.0177
-68	0.0284	0.0233
-67	0.0266	0.023
-66	0.0176	0.0174
-65	0.0132	0.0134
-64	0.0158	0.0192
-63	0.0194	0.0209
-62	0.0176	0.0164
-61	0.0169	0.0164
-60	0.0161	0.0202
-59	0.0186	0.0154
-58	0.0212	0.0145
-57	0.0196	0.0109
-56	0.0148	0.016
-55	0.0122	0.0163
-54	0.0253	0.0126
-53	0.0183	0.0158
-52	0.018	0.0157
-51	0.0209	0.0157
-50	0.0111	0.0117
-49	0.029	0.0176
-48	0.0222	0.016
-47	0.0185	0.0278
-46	0.0189	0.0198
-45	0.0195	0.011
-44	0.0164	0.0117
-43	0.0184	0.015
-42	0.0171	0.0164
-41	0.0196	0.017
-40	0.0228	0.0166
-39	0.021	0.0247
-38	0.016	0.028
-37	0.0204	0.0211
-36	0.0266	0.0161
-35	0.0216	0.0205
-34	0.0306	0.0175
-33	0.0279	0.0173
-32	0.0302	0.0191
-31	0.0275	0.016
-30	0.0197	0.0169
-29	0.0247	0.0149
-28	0.0396	0.019
-27	0.0374	0.022
-26	0.0312	0.0232
-25	0.0368	0.0169
-24	0.0322	0.0208
-23	0.0322	0.031
-22	0.0418	0.0182
-21	0.0451	0.0307
-20	0.0483	0.0157
-19	0.0572	0.021
-18	0.0607	0.023
-17	0.0566	0.0256
-16	0.0613	0.0149
-15	0.0496	0.0221
-14	0.0505	0.0161
-13	0.0385	0.0166
-12	0.0499	0.0224
-11	0.0423	0.0158
-10	0.0229	0.0215
-9	0.0244	0.0209
-8	0.0255	0.0192
-7	0.0207	0.0218
-6	0.0228	0.0203
-5	0.0318	0.0247
-4	0.03	0.029
-3	0.0307	0.0237
-2	0.0296	0.025
-1	0.0259	0.0584
0	0.081	0.0168
1	0.0253	0.0153
2	0.0053	0.0415
3	0.0258	0.0209
4	0.0312	0.0322
5	0.0255	0.0508
6	0.0403	0.0459
7	0.0331	0.0325
8	0.0239	0.0455
9	0.0306	0.0463
10	0.0289	0.0417
11	0.0331	0.0493
12	0.035	0.0358
13	0.0399	0.0371
14	0.0234	0.0395
15	0.0429	0.0334
16	0.0284	0.0325
17	0.0234	0.0259
18	0.0313	0.0257
19	0.0296	0.0303
20	0.0224	0.0429
21	0.03	0.0313
22	0.0288	0.0263
23	0.0307	0.0214
24	0.0258	0.0242
25	0.0256	0.0351
26	0.0271	0.0263
27	0.0235	0.0308
28	0.0217	0.0392
29	0.0222	0.0371
30	0.0152	0.0344
31	0.0153	0.0351
32	0.0185	0.0457
33	0.0135	0.034
34	0.0143	0.0314
35	0.017	0.0307
36	0.0191	0.0352
37	0.0208	0.0328
38	0.0187	0.042
39	0.0185	0.0335
40	0.0222	0.0291
41	0.0274	0.0344
42	0.0182	0.0262
43	0.0184	0.0299
44	0.018	0.0404
45	0.0233	0.0418
46	0.0202	0.0307
47	0.0181	0.036
48	0.0176	0.0325
49	0.0267	0.0486
50	0.0295	0.0286
51	0.0288	0.0228
52	0.0263	0.0278
53	0.0215	0.0307
54	0.0144	0.0261
55	0.0143	0.0297
56	0.0135	0.0248
57	0.0172	0.023
58	0.015	0.0263
59	0.0199	0.0332
60	0.0245	0.0351
61	0.0245	0.0233
62	0.0186	0.0261
63	0.0219	0.0329
64	0.0172	0.0233
65	0.0137	0.0282
66	0.0167	0.0266
67	0.028	0.0303
68	0.0194	0.0266
69	0.0256	0.0239
70	0.0294	0.024
71	0.0283	0.0315
72	0.0266	0.0237
73	0.0316	0.0262
74	0.023	0.0263
75	0.0186	0.0166
76	0.0266	0.0249
77	0.0276	0.0239
78	0.0284	0.0186
79	0.0327	0.0252
80	0.0249	0.018
81	0.0278	0.0212
82	0.0306	0.0166
83	0.0219	0.0185
84	0.0204	0.0188
85	0.0278	0.0168
86	0.0223	0.0211
87	0.0202	0.0181
88	0.0269	0.0219
89	0.0217	0.0163
90	0.0269	0.0161
91	0.0338	0.0157
92	0.0133	0.0228
93	0.018	0.0231
94	0.0276	0.0185
95	0.0171	0.0232
96	0.0188	0.0237
97	0.0192	0.0218
98	0.0241	0.0264
99	0.0229	0.0209
100	0.0245	0.0187
101	0.0206	0.0239
102	0.0162	0.031
103	0.0182	0.0239
104	0.0168	0.012
105	0.0212	0.0254
106	0.0243	0.0177
107	0.0146	0.0187
108	0.0215	0.0291
109	0.0263	0.0193
110	0.022	0.0201
111	0.0193	0.0279
112	0.0208	0.0199
113	0.0203	0.0257
114	0.0145	0.0221
115	0.0261	0.0238
116	0.0184	0.0308
117	0.021	0.0265
118	0.0356	0.022
119	0.0225	0.0243
120	0.0173	0.0282
121	0.0302	0.0137
122	0.0202	0.0176
123	0.0159	0.0184
124	0.0218	0.0233
125	0.022	0.0229
126	0.0182	0.0246
127	0.0245	0.0189
128	0.018	0.0144
129	0.0159	0.0219
130	0.0223	0.0145
131	0.0162	0.0207
132	0.0159	0.024
133	0.0137	0.0204
134	0.0165	0.0238
135	0.0174	0.0205
136	0.0204	0.013
137	0.0186	0.0318
138	0.0229	0.0278
139	0.0251	0.0245
140	0.0245	0.0294
141	0.0212	0.03
142	0.0269	0.017
143	0.023	0.0189
144	0.0164	0.021
145	0.0176	0.0199
146	0.0158	0.0178
147	0.0237	0.0243
148	0.026	0.0229
149	0.0196	0.021
150	0.0119	0.0229
151	0.0196	0.0225
152	0.0174	0.0155
153	0.0222	0.0213
154	0.0273	0.0131
155	0.0188	0.0164
156	0.0166	0.0218
157	0.0196	0.0264
158	0.0154	0.0212
159	0.0161	0.0206
160	0.0119	0.0207
161	0.0189	0.0238
162	0.0173	0.0329
163	0.0167	0.0163
164	0.0185	0.0205
165	0.0125	0.0201
166	0.0317	0.0232
167	0.0104	0.0305
168	0.0214	0.0182
169	0.0156	0.0154
170	0.0131	0.0299
171	0.0193	0.0237
172	0.0201	0.0161
173	0.0261	0.0217
174	0.0199	0.0177
175	0.0174	0.0164
176	0.0154	0.023
177	0.02	0.02
178	0.0284	0.0194
179	0.0197	0.0252
180	0.0112	0.018
181	0.0123	0.0167
182	0.0112	0.0203
183	0.0166	0.0185
184	0.0175	0.0147
185	0.0113	0.0233
186	0.0131	0.0181
187	0.0195	0.0181
188	0.0153	0.0186
189	0.018	0.0217
190	0.0168	0.0169
191	0.0101	0.0172
192	0.0163	0.0213
193	0.0142	0.011
194	0.0135	0.0214
195	0.0175	0.0159
196	0.0156	0.0148
197	0.0163	0.0181
198	0.0163	0.0189
199	0.0205	0.0134
200	0.0133	0.0156
201	0.0216	0.0267
202	0.0213	0.026
203	0.0115	0.0148
204	0.0124	0.0196
205	0.0158	0.0171
206	0.0163	0.0163
207	0.0124	0.0177
208	0.0262	0.0119
209	0.0157	0.0203
210	0.026	0.0183
211	0.0217	0.0104
212	0.0131	0.0238
213	0.0243	0.0137
214	0.0236	0.0108
215	0.0144	0.0194
216	0.0125	0.0142
217	0.0172	0.013
218	0.0139	0.0149
219	0.014	0.0168
220	0.0189	0.015
221	0.01	0.0166
222	0.0144	0.0228
223	0.0254	0.0139
224	0.0168	0.0126
225	0.0119	0.0158
226	0.027	0.013
227	0.0185	0.0122
228	0.0245	0.0125
229	0.037	0.0214
230	0.0187	0.0137
231	0.0198	0.0197
232	0.0229	0.0152
233	0.0116	0.0156
234	0.0152	0.0192
235	0.0234	0.0152
236	0.0189	0.0201
237	0.0186	0.0197
238	0.0163	0.0186
239	0.0152	0.0192
240	0.0107	0.0244
241	0.0255	0.0202
242	0.0202	0.0196
243	0.0147	0.0181
244	0.0205	0.0173
245	0.0142	0.0177
246	0.0155	0.0142
247	0.0226	0.0126
248	0.0137	0.0209
249	0.0148	0.0281
250	0.0258	0.0228
251	0.015	0.0237
252	0.0233	0.0238
253	0.0236	0.0185
254	0.0133	0.0234
255	0.0177	0.0207
256	0.0239	0.0277
257	0.0124	0.0223
258	0.0141	0.0318
259	0.0173	0.0177
260	0.017	0.0213
261	0.0164	0.0217
262	0.0233	0.0159
263	0.0122	0.0192
264	0.0091	0.0206
265	0.0251	0.0157
266	0.0173	0.0211
267	0.0132	0.0183
268	0.0179	0.0152
269	0.0157	0.0217
270	0.0191	0.0176
271	0.0174	0.0123
272	0.0108	0.0208
273	0.0178	0.021
274	0.0271	0.0188
275	0.0183	0.0233
276	0.0198	0.0184
277	0.0235	0.0183
278	0.0159	0.0248
279	0.013	0.0216
280	0.0249	0.0171
281	0.0182	0.015
282	0.0113	0.0176
283	0.0182	0.022
284	0.015	0.0214
285	0.0179	0.0132
286	0.0225	0.0147
287	0.0139	0.0205
288	0.0188	0.0166
289	0.02	0.0103
290	0.0117	0.0175
291	0.0131	0.0189
292	0.0163	0.0143
293	0.0139	0.0169
294	0.0145	0.0192
295	0.022	0.0168
296	0.015	0.0278
297	0.0228	0.026
298	0.0281	0.0172
299	0.0152	0.0226
300	0.0195	0.0268
